# Supplementary material
Source: PubMed Central journal article supplement (PMC5104930)
Supplement: 10.1074_M116.744722_jbc.M116.744722-1.pdf [file 10.1074_M116.744722_jbc.M116.744722-1.pdf]

## human A $\beta$ 1-40

Precursor ion : m/z 4328.076

DAEFRHDSGYEVHHQKLVFFAEDVGSNKGAIIGLMVGGVV

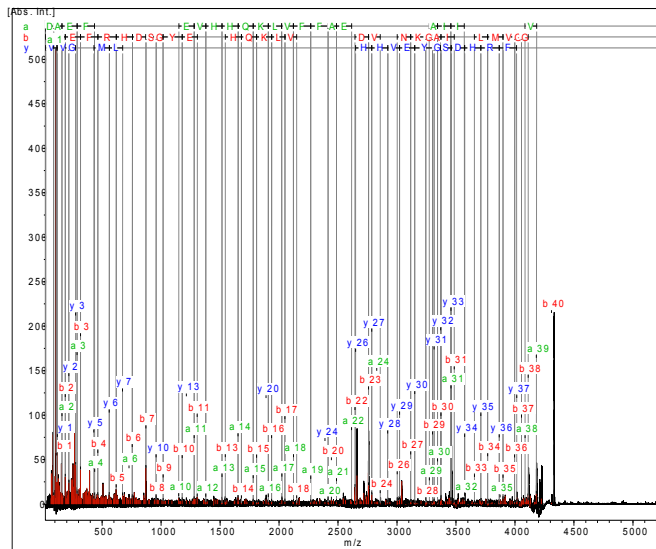

## human A $\beta$ 11-40

Precursor ion : m/z 3150.657

EVHHQKLVFFAEDVGSNKGAIIGLMVGGVV

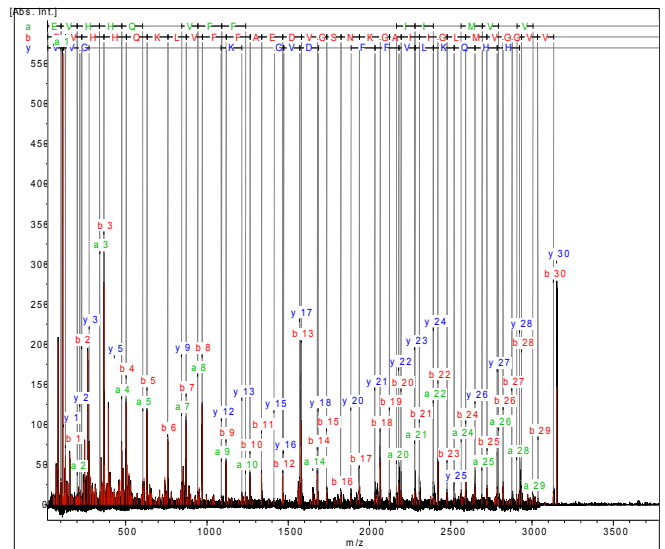

## mouse A $\beta$ 1-40

Precursor ion : m/z 4232.696

DAEFGHDSGFVRRHQKLVFFAEDVGSNKGAIIGLMVGGVV

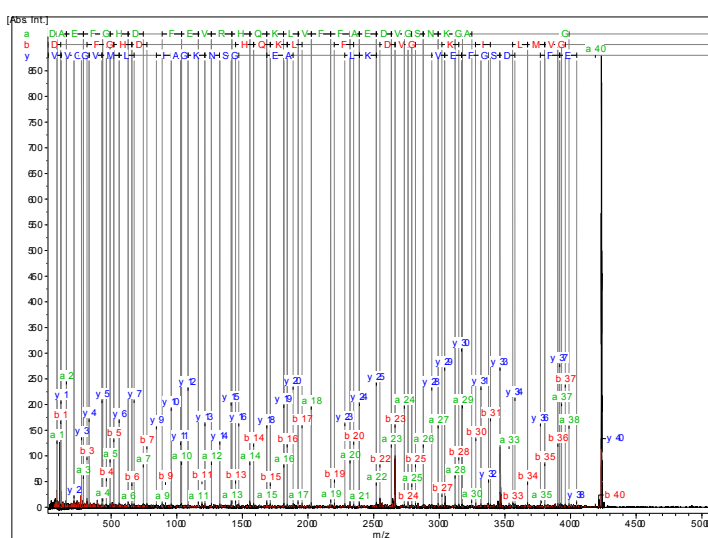

## mouse A $\beta$ 11-40

Precursor ion : m/z 3169.723

EVRRHQKLVFFAEDVGSNKGAIIGLMVGGVV

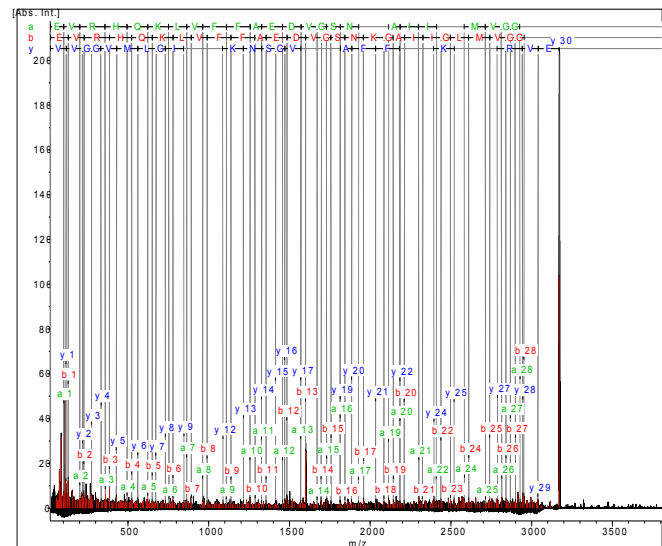

**Figure S1. Confirmation of amino acid sequence of human and mouse A $\beta$ <sup>1-40</sup> and A $\beta$ <sup>11-40</sup> secreted from N2a cells expressed with human and mouse APP.**

Signals of A $\beta$ <sup>1-40</sup> and A $\beta$ <sup>11-40</sup> derived from human APP expressed in N2a cells were subject to tandem MS (MS/MS) analysis as described in Hata *et al.* (*J. Biol. Chem.* [2009] 284, 36024-36033).

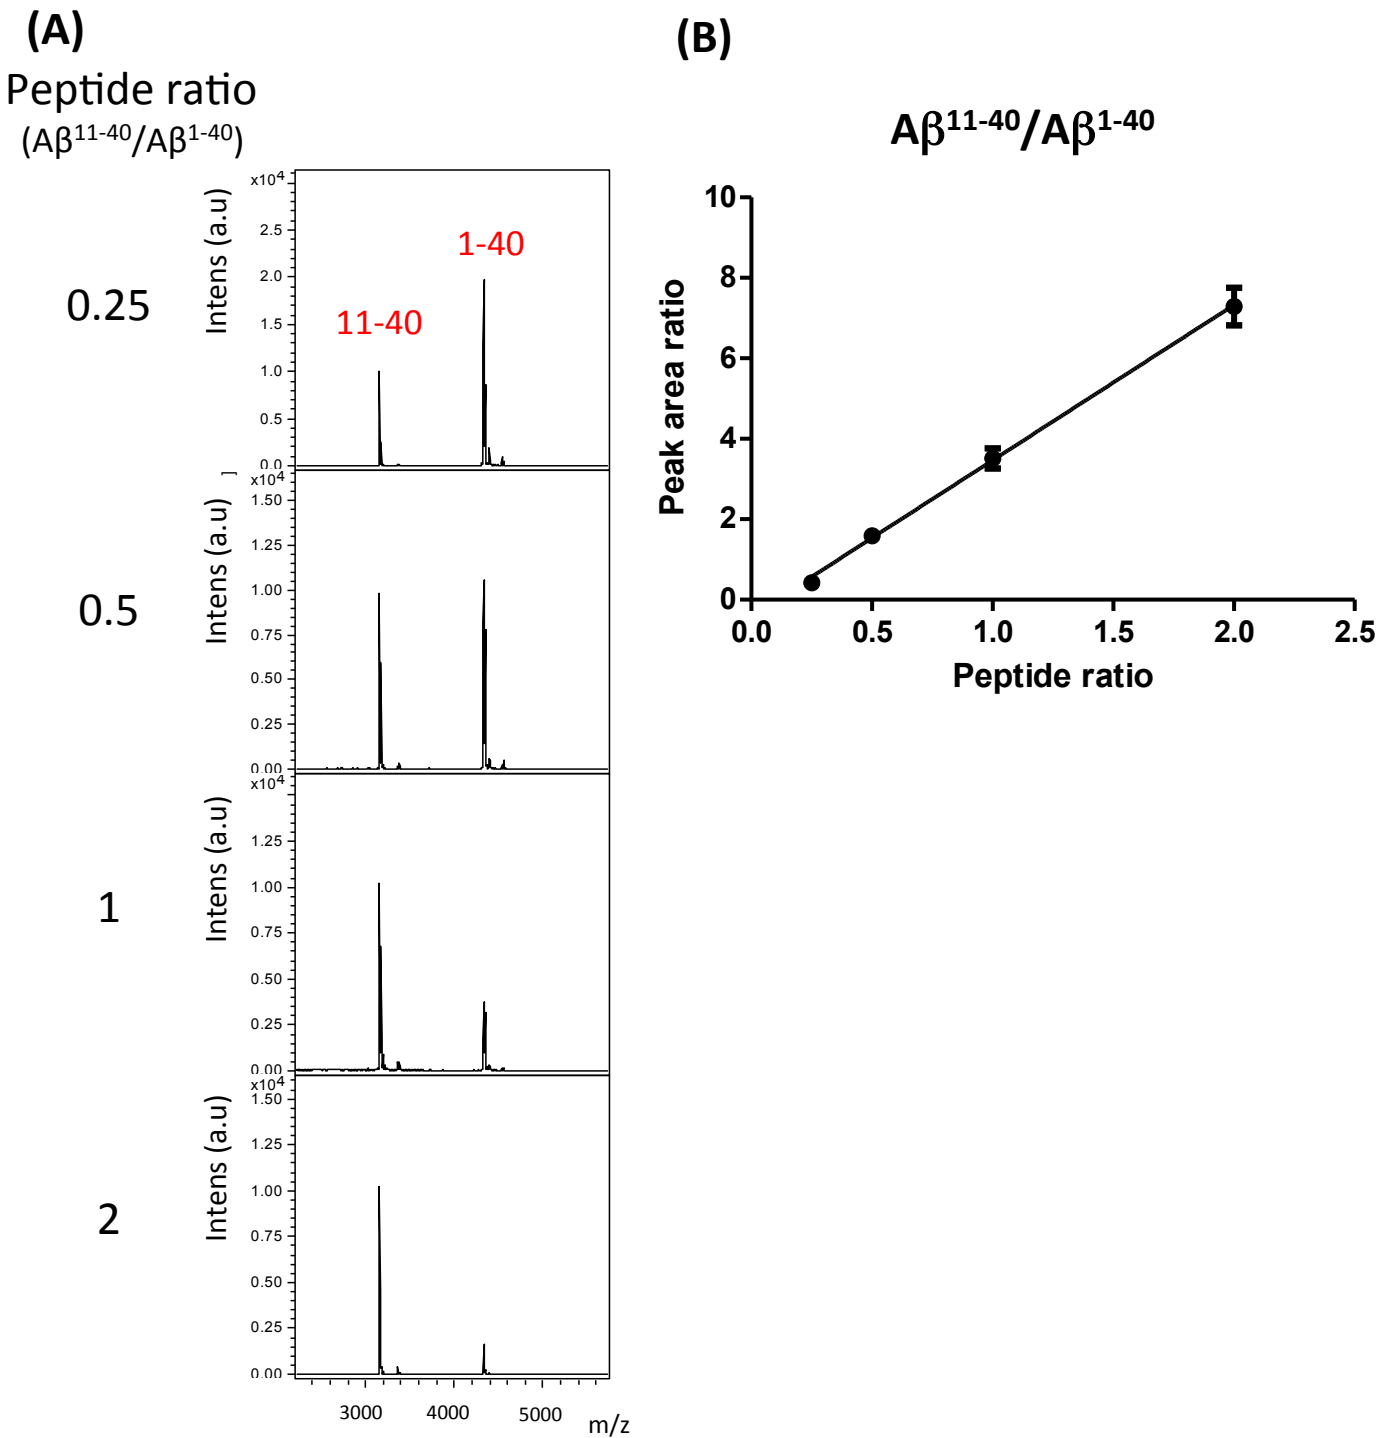

**Figure S2. Quantitative accuracy of mass spectrometric analysis of  $A\beta^{1-40}$  and  $A\beta^{11-40}$ .**

Various ratios of  $A\beta^{1-40}$  and  $A\beta^{11-40}$  peptides mixture were subject to mass spectrometric analysis. Indicated ratios of  $A\beta^{11-40}$  to  $A\beta^{1-40}$  in amounts were analyzed **(A)**, and the relationship between peak areas and amount ratios was shown as a quantitative accuracy of the ratio of  $A\beta^{11-40}/A\beta^{1-40}$  **(B)**. The peak area ratio and amount ratio of  $A\beta^{11-40}/A\beta^{1-40}$  increased proportionally ( $R^2= 0.9628$ ,  $p<0.0001$ ).
